# Supplementary material
Source: bioRxiv or medRxiv preprint supplement (https://www.biorxiv.org/highwire/filestream/54442/field_highwire_adjunct_files/0/138222-1.pdf)
Supplement: Supplementary file [file 138222-1.pdf]

# **The effect of treatment on the microbiota of patients diagnosed with colonic lesions**

Marc A Sze, Nielson T Baxter, Mack T Ruffin IV, Mary AM Rogers, and Patrick D Schloss

Supplemental

**Table S1: P-values of Differences between Initial and Follow Up Samples for Richness, Shannon Diversity, and Evenness.**

| Comparison       | Alpha Metric | P-value   | BH Adjusted P-value |
|------------------|--------------|-----------|---------------------|
| Adenoma          | richness     | 0.2615199 | 0.2942099           |
| Adenoma          | shannon      | 0.2221074 | 0.2942099           |
| Adenoma          | evenness     | 0.2347622 | 0.2942099           |
| Advanced Adenoma | richness     | 0.1231880 | 0.2217384           |
| Advanced Adenoma | shannon      | 0.0204124 | 0.0774651           |
| Advanced Adenoma | evenness     | 0.0258217 | 0.0774651           |
| Carcinoma        | richness     | 0.5822250 | 0.5822250           |
| Carcinoma        | shannon      | 0.0890290 | 0.2003153           |
| Carcinoma        | evenness     | 0.0072909 | 0.0656181           |

**Table S2: Summary of Common OTUs for All Diagnosis Groups**

| OTU     | Lowest Taxonomic ID | Adenoma Median MDA | Advanced Adenoma Median MDA | Carcinoma Median MDA |
|---------|---------------------|--------------------|-----------------------------|----------------------|
| OTU15   | Lachnospiraceae     | 3.04               | 1.82                        | 1.91                 |
| OTU12   | Clostridiales       | 2.70               | 2.20                        | 1.63                 |
| OTU6    | Bacteroides         | 2.64               | 1.98                        | 1.98                 |
| OTU4    | Anaerostipes        | 2.62               | 1.71                        | 2.02                 |
| OTU5    | Bacteroides         | 2.56               | 1.85                        | 1.98                 |
| OTU9    | Blautia             | 2.48               | 1.64                        | 1.62                 |
| OTU61   | Ruminococcaceae     | 2.47               | 1.57                        | 1.79                 |
| OTU13   | Blautia             | 2.46               | 1.90                        | 1.78                 |
| OTU14   | Clostridiales       | 2.44               | 1.74                        | 1.63                 |
| OTU37   | Streptococcus       | 2.38               | 1.83                        | 2.27                 |
| OTU3    | Blautia             | 2.37               | 1.67                        | 1.78                 |
| OTU58   | Lachnospiraceae     | 2.35               | 1.72                        | 1.69                 |
| OTU1    | Bacteroides         | 2.34               | 1.73                        | 2.06                 |
| OTU10   | Roseburia           | 2.34               | 1.55                        | 1.84                 |
| OTU20   | Faecalibacterium    | 2.34               | 1.55                        | 1.62                 |
| OTU59   | Bacteroides         | 2.25               | 1.68                        | 1.73                 |
| OTU16   | Dorea               | 2.23               | 1.66                        | 1.63                 |
| OTU2    | Anaerostipes        | 2.23               | 1.57                        | 1.69                 |
| OTU41   | Clostridium_XI      | 2.22               | 1.67                        | 1.80                 |
| OTU85   | Dorea               | 2.09               | 1.46                        | 1.84                 |
| OTU290  | Clostridium_IV      | 2.08               | 1.45                        | 1.56                 |
| OTU36   | Lachnospiraceae     | 2.06               | 1.54                        | 1.52                 |
| OTU26   | Collinsella         | 2.03               | 1.51                        | 1.94                 |
| OTU28   | Ruminococcus        | 2.00               | 1.49                        | 1.53                 |
| OTU605  | Blautia             | 1.98               | 1.42                        | 1.36                 |
| OTU1307 | Coprobacillus       | 1.03               | 0.93                        | 1.50                 |

**Table S3: Summary of Comparisons Based on Additive Treatment Received (Chemotherapy or Chemotherapy and Radiation)**

| Variable             | Additive Treatment Mean | Removal Mean | Additive Treatment SD | Removal SD | P-value | BH Corrected |
|----------------------|-------------------------|--------------|-----------------------|------------|---------|--------------|
| Richness             | -5.15                   | -32.99       | 93.58                 | 111.2      | 4.9e-01 | 1            |
| Shannon              | 0.23                    | 0.26         | 0.55                  | 0.7        | 7.4e-01 | 1            |
| Evenness             | 0.04                    | 0.06         | 0.08                  | 0.1        | 1.0e+00 | 1            |
| Thetayc              | 0.79                    | 0.77         | 0.17                  | 0.1        | 5.3e-01 | 1            |
| Positive Probability | 0.12                    | 0.10         | 0.21                  | 0.1        | 8.4e-01 | 1            |

**Table S4: Summary of Adenoma based on Surgery Received**

| Variable              | No Surgery |       | Surgery |       | P-value | BH Corrected |
|-----------------------|------------|-------|---------|-------|---------|--------------|
|                       | Mean       | SD    | Mean    | SD    |         |              |
| Richness              | 1e+02      | 138.9 | -4e+01  | 1e+02 | 5.6e-03 | 3.3e-02      |
| Shannon               | 6e-01      | 0.9   | -1e-01  | 4e-01 | 4.5e-02 | 1.4e-01      |
| Evenness              | 6e-02      | 0.1   | -9e-03  | 5e-02 | 1.0e-01 | 2.1e-01      |
| Thetayc               | 7e-01      | 0.2   | 6e-01   | 2e-01 | 4.1e-01 | 5.6e-01      |
| Adenoma Only          |            |       |         |       |         |              |
| Positive Probability  | 2e-02      | 0.2   | 1e-03   | 7e-02 | 9.0e-01 | 9.0e-01      |
| Advanced Adenoma Only |            |       |         |       |         |              |
| Positive Probability  | -9e-03     | 0.1   | 4e-02   | 8e-02 | 4.7e-01 | 5.6e-01      |
